# Supplementary material for: Motor proteins at the mitochondria–cytoskeleton interface
Source: PubMed Central journal article supplement (PMC8077471; doi:10.1242/jcs.226084), 2021-04-15
Supplement: joces-134-226084-s1.pdf [file joces-134-226084-s1.pdf]

**Table S1:** Mutations in mitochondria-linked motor proteins and adaptors causing human diseases

| Gene                                        | Disease                                                                                                           | Reference                                                                                                                                                 |
|---------------------------------------------|-------------------------------------------------------------------------------------------------------------------|-----------------------------------------------------------------------------------------------------------------------------------------------------------|
| MYH9<br>(NMMIIA)                            | Autosomal dominant non-syndromic deafness 17 (DFNA17)                                                             | (Dantas et al., 2014; Hildebrand et al., 2006; Lalwani et al., 2000)                                                                                      |
|                                             | Macrothrombocytopenia and granulocyte inclusions with or without nephritis or sensorineural hearing loss (MATINS) | (Balduini et al., 2011; Heath et al., 2001; Kelley et al., 2000; Kunishima et al., 2001a; Kunishima et al., 2001b; Pecci et al., 2005; Seri et al., 2003) |
| MYH14<br>(NMMIIC)                           | Autosomal dominant non-syndromic deafness 4A (DFNA4A)                                                             | (Donaudy et al., 2004)                                                                                                                                    |
|                                             | Peripheral neuropathy, myopathy, hoarseness and hearing loss (PNMH)                                               | (Almutawa et al., 2019; Choi et al., 2011)                                                                                                                |
| MYO5A                                       | Griscelli syndrome type 1                                                                                         | (Menasche et al., 2002; Pastural et al., 1997; Pastural et al., 2000)                                                                                     |
| MYO6                                        | Autosomal dominant deafness 22 (DFAD22)                                                                           | (Hilgert et al., 2008; Melchionda et al., 2001; Sanggaard et al., 2008)                                                                                   |
|                                             | Autosomal recessive deafness 37 (DFAR37)                                                                          | (Ahmed et al., 2003)                                                                                                                                      |
|                                             | Autosomal dominant deafness with hypertrophic cardiomyopathy (DFNHCM)                                             | (Mohiddin et al., 2004)                                                                                                                                   |
| KIF1B<br>(Kinesin-3)                        | Charcot-Marie-Tooth disease type 2A1 (CMT2A1)                                                                     | (Drew et al., 2015; Zhao et al., 2001)                                                                                                                    |
|                                             | Neuroblastoma 1 (NBLST1)<br>Pheochromocytoma (PCC)                                                                | (Schlisio et al., 2008)                                                                                                                                   |
| KBP<br>(KIFBP)                              | Goldberg-Shprintzen megacolon syndrome (GOSHS)                                                                    | (Brooks et al., 2005; Drevillon et al., 2013; Valence et al., 2013)                                                                                       |
| KIF5A<br>(Kinesin-1)                        | Amyotrophic lateral sclerosis type 25 (ALS25)                                                                     | (Brenner et al., 2018; Nicolas et al., 2018)                                                                                                              |
|                                             | Hereditary Spastic Paraplegia (SPG10)                                                                             | (Crimella et al., 2012; Goizet et al., 2009; Reid et al., 2002)                                                                                           |
|                                             | Neonatal intractable myoclonus (NEIMY)                                                                            | (DaRe et al., 2013; Duis et al., 2016; Ryzanicz et al., 2017)                                                                                             |
| KIF5C<br>(Kinesin-1)                        | Cortical dysplasia complex with other brain malformations 2 (CDCBM2)                                              | (de Ligt et al., 2012; Poirier et al., 2013)                                                                                                              |
| DYNC1H1<br>(Dynein, DHC)                    | Charcot-Marie-Tooth disease type 20 (CMT20, axonal)                                                               | (Weedon et al., 2011)                                                                                                                                     |
|                                             | Mental retardation autosomal dominant 13 (MRD13)                                                                  | (Jamuar et al., 2014; Poirier et al., 2013; Vissers et al., 2010; Willemsen et al., 2012)                                                                 |
|                                             | Spinal muscular atrophy, lower extremity-predominant 1, autosomal dominant (SMA-LED1)                             | (Harms et al., 2010; Harms et al., 2012; Tsurusaki et al., 2012)                                                                                          |
| DYNC1I2<br>(Dynein, DIC)                    | Neurodevelopmental disorder with microcephaly and structural brain anomalies                                      | (Ansar et al., 2019)                                                                                                                                      |
| DCTN1<br>(Dynactin, p150 <sup>Glued</sup> ) | Distal hereditary motor neuronopathy 7B (HMN7B)                                                                   | (Puls et al., 2003)                                                                                                                                       |
|                                             | Amyotrophic lateral sclerosis                                                                                     | (Munch et al., 2004)                                                                                                                                      |
|                                             | Perry syndrome (PERRY)                                                                                            | (Farrer et al., 2009)                                                                                                                                     |
| TRAK1                                       | Epileptic encephalopathy, early infantile 68 (EIEE68)                                                             | (Anazi et al., 2017; Barel et al., 2017; Sagie et al., 2018)                                                                                              |

## Supplementary References

- Ahmed, Z. M., Morell, R. J., Riazuddin, S., Gropman, A., Shaukat, S., Ahmad, M. M., Mohiddin, S. A., Fananapazir, L., Caruso, R. C., Husnain, T. et al. (2003). Mutations of MYO6 are associated with recessive deafness, DFNB37. *Am J Hum Genet* **72**, 1315-22.
- Almutawa, W., Smith, C., Sabouny, R., Smit, R. B., Zhao, T., Wong, R., Lee-Glover, L., Desrochers-Goyette, J., Ilamathi, H. S., Care4Rare Canada, C. et al. (2019). The R941L mutation in MYH14 disrupts mitochondrial fission and associates with peripheral neuropathy. *EBioMedicine* **45**, 379-392.
- Anazi, S., Maddirevula, S., Salpietro, V., Asi, Y. T., Alsahli, S., Alhashem, A., Shamseldin, H. E., AlZahrani, F., Patel, N., Ibrahim, N. et al. (2017). Expanding the genetic heterogeneity of intellectual disability. *Hum Genet* **136**, 1419-1429.
- Ansar, M., Ullah, F., Paracha, S. A., Adams, D. J., Lai, A., Pais, L., Iwaszkiewicz, J., Millan, F., Sarwar, M. T., Agha, Z. et al. (2019). Bi-allelic Variants in DYNC112 Cause Syndromic Microcephaly with Intellectual Disability, Cerebral Malformations, and Dysmorphic Facial Features. *Am J Hum Genet* **104**, 1073-1087.
- Balduini, C. L., Pecci, A. and Savoia, A. (2011). Recent advances in the understanding and management of MYH9-related inherited thrombocytopenias. *Br J Haematol* **154**, 161-74.
- Barel, O., Malicdan, M. C. V., Ben-Zeev, B., Kandel, J., Pri-Chen, H., Stephen, J., Castro, I. G., Metz, J., Atawa, O., Moshkovitz, S. et al. (2017). Deleterious variants in TRAK1 disrupt mitochondrial movement and cause fatal encephalopathy. *Brain* **140**, 568-581.
- Brenner, D., Yilmaz, R., Muller, K., Grehl, T., Petri, S., Meyer, T., Grosskreutz, J., Weydt, P., Ruf, W., Neuwirth, C. et al. (2018). Hot-spot KIF5A mutations cause familial ALS. *Brain* **141**, 688-697.
- Brooks, A. S., Bertoli-Avella, A. M., Burzynski, G. M., Breedveld, G. J., Osinga, J., Boven, L. G., Hurst, J. A., Mancini, G. M., Lequin, M. H., de Coo, R. F. et al. (2005). Homozygous nonsense mutations in KIAA1279 are associated with malformations of the central and enteric nervous systems. *Am J Hum Genet* **77**, 120-6.
- Choi, B. O., Kang, S. H., Hyun, Y. S., Kanwal, S., Park, S. W., Koo, H., Kim, S. B., Choi, Y. C., Yoo, J. H., Kim, J. W. et al. (2011). A complex phenotype of peripheral neuropathy, myopathy, hoarseness, and hearing loss is linked to an autosomal dominant mutation in MYH14. *Hum Mutat* **32**, 669-77.
- Crimella, C., Baschiroto, C., Arnoldi, A., Tonelli, A., Tenderini, E., Airoidi, G., Martinuzzi, A., Trabacca, A., Losito, L., Scarlato, M. et al. (2012). Mutations in the motor and stalk domains of KIF5A in spastic paraplegia type 10 and in axonal Charcot-Marie-Tooth type 2. *Clin Genet* **82**, 157-64.
- Dantas, V. G., Lezirovitz, K., Yamamoto, G. L., Moura de Souza, C. F., Ferreira, S. G. and Mingroni-Netto, R. C. (2014). c.G2114A MYH9 mutation (DFNA17) causes non-syndromic autosomal dominant hearing loss in a Brazilian family. *Genet Mol Biol* **37**, 616-21.
- DaRe, J. T., Vasta, V., Penn, J., Tran, N. T. and Hahn, S. H. (2013). Targeted exome sequencing for mitochondrial disorders reveals high genetic heterogeneity. *BMC Med Genet* **14**, 118.
- de Ligt, J., Willemsen, M. H., van Bon, B. W., Kleefstra, T., Yntema, H. G., Kroes, T., Vulto-van Silfhout, A. T., Koolen, D. A., de Vries, P., Gilissen, C. et al. (2012). Diagnostic exome sequencing in persons with severe intellectual disability. *N Engl J Med* **367**, 1921-9.
- Donaudy, F., Snoeckx, R., Pfister, M., Zenner, H. P., Blin, N., Di Stazio, M., Ferrara, A., Lanzara, C., Ficarella, R., Declau, F. et al. (2004). Nonmuscle myosin heavy-chain gene MYH14 is

expressed in cochlea and mutated in patients affected by autosomal dominant hearing impairment (DFNA4). *Am J Hum Genet* **74**, 770-6.

**Drevillon, L., Megarbane, A., Demeer, B., Matar, C., Benit, P., Briand-Suleau, A., Bodereau, V., Ghomid, J., Nasser, M., Decrouy, X. et al.** (2013). KBP-cytoskeleton interactions underlie developmental anomalies in Goldberg-Shprintzen syndrome. *Hum Mol Genet* **22**, 2387-99.

**Drew, A. P., Zhu, D., Kidambi, A., Ly, C., Tey, S., Brewer, M. H., Ahmad-Annuar, A., Nicholson, G. A. and Kennerson, M. L.** (2015). Improved inherited peripheral neuropathy genetic diagnosis by whole-exome sequencing. *Mol Genet Genomic Med* **3**, 143-54.

**Duis, J., Dean, S., Applegate, C., Harper, A., Xiao, R., He, W., Dollar, J. D., Sun, L. R., Waberski, M. B., Crawford, T. O. et al.** (2016). KIF5A mutations cause an infantile onset phenotype including severe myoclonus with evidence of mitochondrial dysfunction. *Ann Neurol* **80**, 633-7.

**Farrer, M. J., Hulihan, M. M., Kachergus, J. M., Dachsel, J. C., Stoessl, A. J., Grantier, L. L., Calne, S., Calne, D. B., Lechevalier, B., Chapon, F. et al.** (2009). DCTN1 mutations in Perry syndrome. *Nat Genet* **41**, 163-5.

**Goizet, C., Boukhris, A., Mundwiller, E., Tallaksen, C., Forlani, S., Toutain, A., Carriere, N., Paquis, V., Depienne, C., Durr, A. et al.** (2009). Complicated forms of autosomal dominant hereditary spastic paraplegia are frequent in SPG10. *Hum Mutat* **30**, E376-85.

**Harms, M. B., Allred, P., Gardner, R., Jr., Fernandes Filho, J. A., Florence, J., Pestronk, A., Al-Lozi, M. and Baloh, R. H.** (2010). Dominant spinal muscular atrophy with lower extremity predominance: linkage to 14q32. *Neurology* **75**, 539-46.

**Harms, M. B., Ori-McKenney, K. M., Scoto, M., Tuck, E. P., Bell, S., Ma, D., Masi, S., Allred, P., Al-Lozi, M., Reilly, M. M. et al.** (2012). Mutations in the tail domain of DYNC1H1 cause dominant spinal muscular atrophy. *Neurology* **78**, 1714-20.

**Heath, K. E., Campos-Barros, A., Toren, A., Rozenfeld-Granot, G., Carlsson, L. E., Savage, J., Denison, J. C., Gregory, M. C., White, J. G., Barker, D. F. et al.** (2001). Nonmuscle myosin heavy chain IIA mutations define a spectrum of autosomal dominant macrothrombocytopenias: May-Hegglin anomaly and Fechtner, Sebastian, Epstein, and Alport-like syndromes. *Am J Hum Genet* **69**, 1033-45.

**Hildebrand, M. S., de Silva, M. G., Gardner, R. J., Rose, E., de Graaf, C. A., Bahlo, M. and Dahl, H. H.** (2006). Cochlear implants for DFNA17 deafness. *Laryngoscope* **116**, 2211-5.

**Hilgert, N., Topsakal, V., van Dinther, J., Offeciers, E., Van de Heyning, P. and Van Camp, G.** (2008). A splice-site mutation and overexpression of MYO6 cause a similar phenotype in two families with autosomal dominant hearing loss. *Eur J Hum Genet* **16**, 593-602.

**Jamuar, S. S., Lam, A. T., Kircher, M., D'Gama, A. M., Wang, J., Barry, B. J., Zhang, X., Hill, R. S., Partlow, J. N., Rozzo, A. et al.** (2014). Somatic mutations in cerebral cortical malformations. *N Engl J Med* **371**, 733-43.

**Kelley, M. J., Jawien, W., Ortel, T. L. and Korczak, J. F.** (2000). Mutation of MYH9, encoding non-muscle myosin heavy chain A, in May-Hegglin anomaly. *Nat Genet* **26**, 106-8.

**Kunishima, S., Kojima, T., Matsushita, T., Tanaka, T., Tsurusawa, M., Furukawa, Y., Nakamura, Y., Okamura, T., Amemiya, N., Nakayama, T. et al.** (2001a). Mutations in the NMMHC-A gene cause autosomal dominant macrothrombocytopenia with leukocyte inclusions (May-Hegglin anomaly/Sebastian syndrome). *Blood* **97**, 1147-9.

**Kunishima, S., Matsushita, T., Kojima, T., Amemiya, N., Choi, Y. M., Hosaka, N., Inoue, M., Jung, Y., Mamiya, S., Matsumoto, K. et al.** (2001b). Identification of six novel MYH9 mutations and genotype-phenotype relationships in autosomal dominant macrothrombocytopenia with leukocyte inclusions. *J Hum Genet* **46**, 722-9.

**Lalwani, A. K., Goldstein, J. A., Kelley, M. J., Luxford, W., Castelein, C. M. and Mhatre, A. N.** (2000). Human Nonsyndromic Hereditary Deafness DFNA17 Is Due to a Mutation in Nonmuscle Myosin MYH9. *The American Journal of Human Genetics* **67**, 1121-1128.

**Melchionda, S., Ahituv, N., Bisceglia, L., Sobe, T., Glaser, F., Rabionet, R., Arbones, M. L., Notarangelo, A., Di Iorio, E., Carella, M. et al.** (2001). MYO6, the human homologue of the gene responsible for deafness in Snell's waltzer mice, is mutated in autosomal dominant nonsyndromic hearing loss. *Am J Hum Genet* **69**, 635-40.

**Menasche, G., Fischer, A. and de Saint Basile, G.** (2002). Griscelli syndrome types 1 and 2. *Am J Hum Genet* **71**, 1237-8; author reply 1238.

**Mohiddin, S. A., Ahmed, Z. M., Griffith, A. J., Tripodi, D., Friedman, T. B., Fananapazir, L. and Morell, R. J.** (2004). Novel association of hypertrophic cardiomyopathy, sensorineural deafness, and a mutation in unconventional myosin VI (MYO6). *J Med Genet* **41**, 309-14.

**Munch, C., Sedlmeier, R., Meyer, T., Homberg, V., Sperfeld, A. D., Kurt, A., Prudlo, J., Peraus, G., Hanemann, C. O., Stumm, G. et al.** (2004). Point mutations of the p150 subunit of dynactin (DCTN1) gene in ALS. *Neurology* **63**, 724-6.

**Nicolas, A. Kenna, K. P. Renton, A. E. Ticozzi, N. Faghri, F. Chia, R. Dominov, J. A. Kenna, B. J. Nalls, M. A. Keagle, P. et al.** (2018). Genome-wide Analyses Identify KIF5A as a Novel ALS Gene. *Neuron* **97**, 1268-1283 e6.

**Pastural, E., Barrat, F. J., Dufourcq-Lagelouse, R., Certain, S., Sanal, O., Jabado, N., Seger, R., Griscelli, C., Fischer, A. and de Saint Basile, G.** (1997). Griscelli disease maps to chromosome 15q21 and is associated with mutations in the myosin-Va gene. *Nat Genet* **16**, 289-92.

**Pastural, E., Ersoy, F., Yalman, N., Wulffraat, N., Grillo, E., Ozkinay, F., Tezcan, I., Gedikoglu, G., Philippe, N., Fischer, A. et al.** (2000). Two genes are responsible for Griscelli syndrome at the same 15q21 locus. *Genomics* **63**, 299-306.

**Pecci, A., Canobbio, I., Balduini, A., Stefanini, L., Cisterna, B., Marseglia, C., Noris, P., Savoia, A., Balduini, C. L. and Torti, M.** (2005). Pathogenetic mechanisms of hematological abnormalities of patients with MYH9 mutations. *Hum Mol Genet* **14**, 3169-78.

**Poirier, K., Lebrun, N., Broix, L., Tian, G., Saillour, Y., Boscheron, C., Parrini, E., Valence, S., Pierre, B. S., Oger, M. et al.** (2013). Mutations in TUBG1, DYNC1H1, KIF5C and KIF2A cause malformations of cortical development and microcephaly. *Nat Genet* **45**, 639-47.

**Puls, I., Jonnakuty, C., LaMonte, B. H., Holzbaur, E. L., Tokito, M., Mann, E., Floeter, M. K., Bidus, K., Drayna, D., Oh, S. J. et al.** (2003). Mutant dynactin in motor neuron disease. *Nat Genet* **33**, 455-6.

**Reid, E., Kloos, M., Ashley-Koch, A., Hughes, L., Bevan, S., Svenson, I. K., Graham, F. L., Gaskell, P. C., Dearlove, A., Pericak-Vance, M. A. et al.** (2002). A kinesin heavy chain (KIF5A) mutation in hereditary spastic paraplegia (SPG10). *Am J Hum Genet* **71**, 1189-94.

**Rydzanicz, M., Jagla, M., Kosinska, J., Tomasik, T., Sobczak, A., Pollak, A., Herman-Sucharska, I., Walczak, A., Kwinta, P. and Ploski, R.** (2017). KIF5A de novo mutation associated with myoclonic seizures and neonatal onset progressive leukoencephalopathy. *Clin Genet* **91**, 769-773.

**Sagie, S., Lerman-Sagie, T., Maljevic, S., Yosovich, K., Detert, K., Chung, S. K., Rees, M. I., Lerche, H. and Lev, D.** (2018). Expanding the phenotype of TRAK1 mutations: hyperekplexia and refractory status epilepticus. *Brain* **141**, e55.

**Sanggaard, K. M., Kjaer, K. W., Eiberg, H., Nurnberg, G., Nurnberg, P., Hoffman, K., Jensen, H., Sorum, C., Rendtorff, N. D. and Tranebjaerg, L.** (2008). A novel nonsense mutation in

MYO6 is associated with progressive nonsyndromic hearing loss in a Danish DFNA22 family. *Am J Med Genet A* **146A**, 1017-25.

**Schlisio, S., Kenchappa, R. S., Vredeveld, L. C., George, R. E., Stewart, R., Greulich, H., Shahriari, K., Nguyen, N. V., Pigny, P., Dahia, P. L. et al.** (2008). The kinesin KIF1Bbeta acts downstream from EglN3 to induce apoptosis and is a potential 1p36 tumor suppressor. *Genes Dev* **22**, 884-93.

**Seri, M., Pecci, A., Di Bari, F., Cusano, R., Savino, M., Panza, E., Nigro, A., Noris, P., Gangarossa, S., Rocca, B. et al.** (2003). MYH9-Related Disease: May-Hegglin Anomaly, Sebastian Syndrome, Fechtner Syndrome, and Epstein Syndrome Are not Distinct Entities but Represent a Variable Expression of a Single Illness. *Medicine* **82**.

**Tsurusaki, Y., Saitoh, S., Tomizawa, K., Sudo, A., Asahina, N., Shiraishi, H., Ito, J., Tanaka, H., Doi, H., Saito, H. et al.** (2012). A DYNC1H1 mutation causes a dominant spinal muscular atrophy with lower extremity predominance. *neurogenetics* **13**, 327-32.

**Valence, S., Poirier, K., Lebrun, N., Saillour, Y., Sonigo, P., Bessieres, B., Attie-Bitach, T., Benachi, A., Masson, C., Encha-Razavi, F. et al.** (2013). Homozygous truncating mutation of the KBP gene, encoding a KIF1B-binding protein, in a familial case of fetal polymicrogyria. *neurogenetics* **14**, 215-24.

**Vissers, L. E., de Ligt, J., Gilissen, C., Janssen, I., Steehouwer, M., de Vries, P., van Lier, B., Arts, P., Wieskamp, N., del Rosario, M. et al.** (2010). A de novo paradigm for mental retardation. *Nat Genet* **42**, 1109-12.

**Weedon, M. N., Hastings, R., Caswell, R., Xie, W., Paszkiewicz, K., Antoniadis, T., Williams, M., King, C., Greenhalgh, L., Newbury-Ecob, R. et al.** (2011). Exome sequencing identifies a DYNC1H1 mutation in a large pedigree with dominant axonal Charcot-Marie-Tooth disease. *Am J Hum Genet* **89**, 308-12.

**Willemsen, M. H., Vissers, L. E., Willemsen, M. A., van Bon, B. W., Kroes, T., de Ligt, J., de Vries, B. B., Schoots, J., Lugtenberg, D., Hamel, B. C. et al.** (2012). Mutations in DYNC1H1 cause severe intellectual disability with neuronal migration defects. *J Med Genet* **49**, 179-83.

**Zhao, C., Takita, J., Tanaka, Y., Setou, M., Nakagawa, T., Takeda, S., Yang, H. W., Terada, S., Nakata, T., Takei, Y. et al.** (2001). Charcot-Marie-Tooth disease type 2A caused by mutation in a microtubule motor KIF1Bbeta. *Cell* **105**, 587-97.
